# Supplementary material for: The impact of advance organizers in virtual classrooms on the development of integrated science process skills
Source: PeerJ Comput Sci. 2024 Apr 5;10:e1989. doi: 10.7717/peerj-cs.1989 (PMC11042017; doi:10.7717/peerj-cs.1989)
Supplement: Supplemental Information 1 [file peerj-cs-10-1989-s001.xlsx]

## Sheet: Sheet1
PEOU1_1	PEOU2_1	PEOU3_1	PEOU4_1	PEOU1_2	PEOU2_2	PEOU3_2	PEOU4_2	PU1_1	PU2_1	PU3_1	PU4_1	PU1_2	PU2_2	PU3_2	PU4_2	ATT1_1	ATT2_1	ATT3_1	ATT4_1	ATT1_2	ATT2_2	ATT3_2	OD Pr/Po	DAV Pr/Po	QA Pr/Po	PX Pr/Po	RI Pr/Po
7	3	5	4	7	6	6	3	3	5	5	2	7	2	4	6	1	5	2	3	7	6	6	5	5	2	6	6		50			65
5	5	4	5	5	7	7	7	5	2	7	7	5	6	7	4	5	7	7	6	6	7	7	7	6	5	7	7		64			66
4	6	6	7	6	7	5	5	6	7	1	5	2	7	6	7	4	4	5	4	4	4	5	6	3	4	4	7		55			66
3	4	4	1	6	4	5	5	4	4	6	3	6	7	6	7	4	2	4	4	7	5	5	7	4	4	2	5		57			65
6	7	2	7	4	5	4	6	5	6	6	6	7	5	7	6	6	6	4	7	7	5	6	4	4	6	2	7		59			66
4	7	3	3	7	2	6	4	1	3	5	2	4	5	4	4	7	3	3	1	6	2	7	6	3	7	7	4		64			67
3	3	5	1	5	7	3	6	5	5	4	7	5	4	5	5	2	1	6	4	5	7	7	7	3	1	5	6		50			65
7	7	5	5	6	5	4	6	7	4	2	2	6	4	2	7	3	3	6	4	5	7	6	6	5	5	5	6		69			65
6	5	4	4	3	5	4	7	6	2	5	7	7	6	7	3	5	5	2	6	6	6	6	5	2	5	7	7		56			66
5	3	4	4	7	4	6	2	2	7	6	5	7	5	7	4	4	4	2	2	7	3	5	7	5	7	2	3		58			67
3	6	5	7	6	3	5	6	7	7	2	1	5	7	4	5	1	4	4	7	7	7	7	4	5	1	6	4		58			65
4	6	6	3	5	6	6	5	5	5	4	7	5	2	5	6	6	2	5	1	5	7	7	6	4	2	4	7		55			68
7	5	4	5	5	6	6	5	5	2	7	3	6	5	4	3	5	5	2	6	5	5	5	1	6	5	4	6		57			66
2	4	3	6	4	7	7	7	3	7	5	5	4	5	6	7	3	3	1	3	6	6	6	7	3	3	7	6		56			67
4	1	5	7	6	5	1	4	7	1	2	4	4	7	6	4	7	3	6	5	7	6	6	7	5	3	3	4		58			65
3	3	4	1	5	6	3	4	1	7	6	7	6	7	7	5	2	4	2	4	7	4	7	5	4	4	5	7		59			65
5	4	3	6	5	5	5	6	6	2	4	2	6	4	1	7	5	3	2	6	4	5	7	5	2	5	1	3		57			66
7	5	7	3	7	5	6	3	5	7	2	1	7	6	2	7	4	7	4	2	5	7	5	4	3	3	7	7		51			69
6	6	5	7	6	6	4	5	2	6	7	5	5	6	7	6	6	6	5	2	1	7	6	6	5	6	2	1		66			66
4	7	6	1	1	7	7	5	4	6	5	3	6	7	7	4	2	3	3	3	7	6	6	7	7	7	6	7		58			66
5	6	3	5	7	5	1	2	5	4	1	6	7	5	5	4	1	4	3	4	0	3	7	5	1	1	3	2		59			65
3	3	2	4	3	4	5	5	7	5	6	1	5	5	4	5	3	4	4	4	6	5	4	5	3	5	4	7		56			66
7	5	2	7	5	4	3	7	6	5	2	5	2	7	4	7	4	2	4	5	6	5	6	6	6	6	5	5		57			66
6	4	5	5	4	6	6	5	6	7	7	7	4	6	6	6	5	5	7	5	7	7	6	7	5	3	2	7		56			67
2	2	4	6	6	5	2	5	1	1	4	4	4	6	6	6	3	4	1	2	5	6	7	7	7	4	4	5		58			65
4	3	1	3	6	7	4	4	2	2	2	5	6	4	6	2	6	2	1	7	4	6	5	4	4	4	1	5		59			66
4	5	5	7	5	3	7	6	5	5	6	4	6	5	4	7	1	5	6	6	7	7	5	5	5	2	7	7		57			68
3	5	3	2	5	7	7	6	4	4	4	2	7	6	5	5	2	4	5	3	7	7	7	4	4	7	5	7		58			65
5	6	7	1	7	5	5	7	3	1	1	4	5	7	7	1	7	6	7	5	5	5	7	4	6	5	3	4		58			65
1	4	4	7	6	7	6	3	5	5	6	7	6	5	3	6	5	3	4	2	5	6	2	6	6	3	5	6		56			65
7	7	4	4	4	5	2	7	4	5	3	5	7	7	7	6	3	1	2	4	4	6	7	6	4	7	4	7		57			67
6	1	6	7	4	2	4	6	4	4	1	3	4	6	5	5	5	5	6	3	4	7	6	7	5	5	2	3		57			66
7	6	3	4	7	6	5	6	4	6	7	4	1	5	4	5	5	5	2	3	6	5	4	5	3	2	3	7		55			69
6	5	5	6	6	6	1	1	6	2	5	7	5	4	6	4	4	2	2	5	6	5	5	1	7	3	6	7		59			65
2	5	4	1	3	7	6	7	2	4	7	6	5	7	7	4	6	2	5	4	7	7	6	7	5	6	1	6		59			66
5	6	2	6	5	7	6	5	5	4	1	3	6	5	5	6	7	4	1	4	1	4	7	7	5	4	2	4		58			66
4	4	2	1	2	5	7	4	7	6	5	6	7	6	4	7	2	3	1	6	7	6	1	6	4	5	5	7		54			66
6	4	3	5	7	5	4	4	7	5	7	2	7	7	5	4	1	3	7	3	5	6	6	5	2	7	4	5		65			68
7	4	5	7	1	6	5	6	3	1	4	7	4	7	6	3	3	4	3	2	7	7	7	7	6	4	2	6		55			65
1	3	6	2	6	7	5	7	5	2	1	4	4	5	4	5	5	4	4	7	6	5	7	5	4	6	3	1		57			65
4	7	4	5	5	6	6	6	4	4	2	4	5	4	7	7	3	1	5	5	4	5	5	6	5	6	6	7		59			67
3	7	4	7	4	7	7	5	6	3	5	5	5	6	5	4	4	7	2	6	2	7	6	7	2	7	4	4		56			66
7	5	3	6	4	5	4	3	2	5	6	3	5	6	4	5	6	5	6	7	7	2	7	2	6	4	2	4		59			65
1	6	2	4	6	6	5	7	2	5	1	6	6	6	6	6	7	5	7	4	7	7	4	6	4	2	5	5		58			65
5	7	7	3	5	4	1	6	4	4	6	7	7	7	6	7	5	4	4	5	7	7	6	6	5	5	4	6		56			66
4	5	5	2	5	3	5	7	5	2	5	4	5	5	7	4	3	4	2	6	6	6	5	5	3	2	4	7		59			65
3	2	3	2	7	7	6	5	4	7	3	4	7	5	7	5	4	6	1	3	4	7	7	7	5	7	3	7		57			66
6	5	6	5	7	5	7	5	6	2	6	5	2	4	5	5	2	2	4	2	5	5	7	7	7	5	6	5		56			66
5	6	1	3	6	6	3	6	1	5	3	3	6	4	4	4	3	2	3	7	5	5	6	6	1	4	4	6		55			65
7	3	4	5	5	4	7	4	7	4	6	7	7	7	7	2	5	5	5	4	7	7	5	6	5	4	5	2		58			67
1	5	2	4	4	5	6	7	4	3	3	4	5	5	5	6	5	4	6	3	5	4	7	7	6	3	2	6		56			66
4	3	3	4	5	3	2	3	2	5	5	5	4	6	7	7	5	4	6	5	6	4	1	5	3	3	4	2		63			67
6	2	5	2	6	6	7	7	5	4	1	6	5	5	6	3	7	6	2	6	6	6	6	6	5	7	5	7		57			65
5	4	5	5	7	7	4	5	7	6	7	4	6	5	4	5	7	6	4	3	7	7	7	7	4	6	2	5		56			67
2	5	4	6	1	5	6	6	5	7	4	2	7	7	7	4	6	7	4	4	5	3	7	6	2	2	6	5		59			69
4	7	3	3	5	6	5	7	5	4	2	7	5	6	5	7	4	5	2	5	5	7	7	6	3	7	2	7		57			65
2	5	5	4	5	4	4	3	2	5	2	4	7	6	7	6	3	2	5	3	6	5	6	7	7	5	5	4		57			66
5	5	2	5	2	3	6	7	4	2	4	5	5	7	2	2	5	1	4	2	7	5	5	5	5	2	4	6		56			68
4	6	4	7	7	7	6	6	6	2	6	5	6	7	7	2	1	1	2	7	6	6	7	6	5	3	2	7		58			68
3	4	6	3	6	6	7	7	3	5	5	5	7	5	5	7	2	6	2	5	6	6	4	7	5	4	2	4		59			66
5	3	7	6	6	7	7	6	7	4	6	4	4	5	5	5	7	4	4	4	4	7	6	5	4	6	4	6		55			67
4	3	3	4	6	5	5	7	5	6	2	6	5	6	7	7	5	4	4	6	5	4	5	2	4	4	5	7		59			69
3	7	5	5	5	5	3	5	3	3	4	6	7	7	1	4	3	2	3	3	7	4	2	4	2	4	3	4		56			69
5	4	2	6	7	7	1	6	6	7	1	2	4	4	7	6	6	5	2	7	7	7	7	4	1	2	3	6		58			65
3	7	4	4	7	6	6	5	4	5	5	7	6	5	4	5	4	7	3	4	6	7	4	5	7	5	4	7		57			68
6	6	5	5	4	7	5	5	5	1	7	1	7	2	6	7	4	5	5	3	7	5	6	7	6	5	4	2		56			66
7	5	3	2	5	5	5	6	6	2	2	4	4	7	6	4	2	5	4	5	5	6	6	7	6	3	6	7		59			67
1	1	7	3	6	6	7	7	7	5	6	5	5	1	7	5	5	2	3	2	6	4	5	6	4	4	2	3		55			69
6	3	5	6	6	7	1	4	5	4	3	7	6	3	5	6	1	4	6	6	6	7	7	7	4	6	5	6		58			65
3	7	6	6	3	5	7	4	3	4	4	4	2	7	5	4	7	3	6	7	5	6	7	7	2	2	5	7		56			67
3	5	3	1	7	5	5	3	7	5	3	6	7	7	7	6	6	3	5	5	5	7	5	6	5	4	7	5		59			66
2	3	4	4	7	7	7	5	2	3	5	3	1	2	4	7	3	1	3	2	7	6	6	4	2	2	1	5		57			68
7	7	4	4	5	6	5	1	2	4	7	5	6	1	7	5	5	1	4	7	6	6	6	5	5	2	1	7		56			65
3	6	2	5	4	7	7	3	5	6	6	4	7	6	5	5	4	7	4	4	7	7	7	5	4	3	7	4		58			67
6	4	5	2	4	5	1	3	1	4	2	2	4	5	5	3	5	5	2	2	7	5	5	6	3	4	2	2		56			69
3	5	6	2	6	7	2	6	6	4	4	1	2	3	2	7	2	2	5	6	5	7	5	6	1	5	7	7		56			66
4	3	6	3	7	6	6	7	4	5	2	7	6	7	7	4	7	5	5	3	6	5	7	7	5	4	5	1		57			65
5	2	1	5	2	4	1	5	3	6	5	5	4	6	6	6	4	4	3	5	7	7	6	5	4	7	2	7		59			68
6	2	5	4	3	5	7	7	7	4	5	4	7	5	4	5	6	2	4	4	5	6	6	6	4	2	3	3		55			69
2	3	5	4	6	7	6	4	6	2	4	4	7	6	2	5	6	6	4	2	7	6	7	5	6	7	6	6		58			66
3	2	5	6	5	7	1	6	2	7	6	5	5	4	7	7	1	4	3	3	6	7	5	1	6	1	4	7		56			66
4	4	3	1	7	5	7	2	6	7	3	2	4	4	5	4	2	2	5	5	6	7	6	7	3	5	7	1		58			68
7	5	4	2	7	5	6	7	5	6	5	7	4	7	4	5	4	5	2	3	7	6	2	7	5	4	2	5		59			68
1	3	5	5	2	6	7	5	1	3	4	4	6	7	6	5	2	7	6	4	5	5	7	6	4	4	4	7		57			67
3	2	6	7	6	4	5	6	7	3	2	4	5	5	6	7	4	1	6	6	5	6	6	6	2	6	5	4		58			65
4	6	4	6	5	3	3	7	5	5	5	6	7	6	1	4	1	5	4	3	7	6	5	4	5	7	2	7		58			69
6	4	3	5	5	7	7	7	2	4	5	6	2	6	7	6	5	2	4	7	4	7	7	5	4	7	7	5		58			69
2	7	7	3	6	5	1	5	4	6	4	5	7	7	7	7	5	7	2	2	6	5	7	7	6	2	2	3		56			69
7	6	5	4	4	7	7	6	4	6	2	2	6	5	5	5	7	2	3	5	7	6	6	7	3	7	3	7		57			65
4	5	6	4	3	6	6	7	5	7	5	4	5	4	3	7	7	2	3	4	7	7	5	5	5	1	6	2		59			66
																							7	5	7	2	3		58			67
																							4	5	1	6	4		58			65
																							6	4	2	4	7		55			68
																							1	6	5	4	6		57			66
																							7	3	3	7	6		56			67
																							7	5	3	3	4		58			65
																							5	4	4	5	7		59			65
																							5	2	5	1	3		57			66
																							4	3	3	7	7		51			69
																							6	5	6	2	1		66			66
																							7	7	7	6	7		58			66
																							5	1	1	3	2		59			65
																							5	3	5	4	7		56			66
																							6	6	6	5	5		57			66
																							7	5	3	2	7		56			67
																							7	7	4	4	5		58			65
																							4	4	4	1	5		59			66
																							5	5	2	7	7		57			68
																							4	4	7	5	7		58			65
																							4	6	5	3	4		58			65
																							6	6	3	5	6		56			65
																							6	4	7	4	7		57			67
																							7	5	5	2	3		57			66
																							5	3	2	3	7		55			69
																							1	7	3	6	7		59			65
																							7	5	6	1	6		59			66
																							7	5	4	2	4		58			66
																							6	4	5	5	7		54			66
																							5	2	7	4	5		65			68
																							7	6	4	2	6		55			65
																							5	4	6	3	1		57			65
																							6	5	6	6	7		59			67
																							7	2	7	4	4		56			66
																							2	6	4	2	4		59			65
																							6	4	2	5	5		58			65
																							6	5	5	4	6		56			66
																							5	3	2	4	7		59			65
																							7	5	7	3	7		57			66
